# Supplementary material for: Genome-wide characterization of the auxin response factor (ARF) gene family of litchi (Litchi chinensis Sonn.): phylogenetic analysis, miRNA regulation and expression changes during fruit abscission
Source: PeerJ. 2019 Apr 4;7:e6677. doi: 10.7717/peerj.6677 (PMC6451834; doi:10.7717/peerj.6677)
Supplement: Supplemental Information 1 [file peerj-07-6677-s001.xlsx]

## Sheet: TableS1
Table S1 Information of LcARF genes
Type	Gene name	Locus ID	ORF Length	No. of exons	Protein properties			Localization
					Length	PI	Molecular Weight (Da）
Class I	LcARF6A	CCG021402.1	2697	14	898	6.24	99490.2	Nuclear
	LcARF6B	CCG038993.1	2694	14	897	6.24	99544.3	Nuclear
	LcARF6C	CCG024350.1	3462	15	1153	5.61	126061	Nuclear
	LcARF6D	CCG067662.2	2727	14	908	6.07	100371	Nuclear
	LcARF8A	CCG028861.1	1956	10	651	6.12	72899.1	Nuclear
	LcARF8B	CCG008564.1	2490	14	829	5.79	92663.2	Nuclear
	LcARF7A	CCG050689.1	2234	12	744	7.04	82612.1	Nuclear
	LcARF7B	CCG017701.3	3054	14	1017	7	112982	Nuclear
	LcARF19A	CCG039561.1	1686	11	561	8.64	63203.4	Nuclear
	LcARF19B	CCG027900.3	2283	14	760	5.55	84142.6	Nuclear
	LcARF5A	CCG022639.2	3168	16	1055	5.42	116826	Nuclear
	LcARF5B	CCG041616.1	1802	14	933	5.3	103325	Nuclear
ClassⅡ	LcARF3A	CCG004437.2	2244	10	747	6.5	81227.1	Nuclear
	LcARF3B	CCG054987.1	2238	10	745	6.57	80986.9	Nuclear
	LcARF4A	CCG002664.1	3603	17	1200	7.19	135163	Nuclear
	LcARF4B	CCG032289.1	2379	12	792	6.49	88204.5	Nuclear
	LcARF4C	CCG041746.2	2379	12	792	6.34	88137.4	Nuclear
	LcARF2A	CCG026224.1	2271	11	756	6.74	84253.2	Nuclear
	LcARF2B	CCG035876.1	2271	11	756	6.89	84396.4	Nuclear
	LcARF2C	CCG020440.3	2508	14	835	6.09	93095.4	Nuclear
	LcARF2D	CCG029922.1	2414	13	804	6.25	89960.9	Nuclear
	LcARF18A	CCG061747.1	2124	14	707	6.29	78667.6	Nuclear
	LcARF18B	CCG055681.1	1917	12	638	6.28	70737.9	Nuclear
	LcARF9A	CCG053846.2	2064	14	687	5.96	76903.4	Nuclear
	LcARF9B	CCG052762.1	2067	14	688	6.02	77047.6	Nuclear
	LcARF1B	CCG003586.1	783	8	260	5.51	29522.5	Nuclear and Cytoplasmic
	LcARF1C	CCG056838.1	1509	15	502	5.78	55827.7	PlasmaMembrane
	LcARF1D	CCG003579.1	1185	11	394	5.78	43924.1	Nuclear and PlasmaMembrane
	LcARF1A	CCG055607.1	1521	9	506	5.86	55551.5	Nuclear
	LcARF2E	CCG039825.1	2430	15	809	6.07	90404.9	Nuclear
	LcARF2F	CCG047004.1	2148	14	715	7.52	79525.9	Nuclear
Class Ⅲ	LcARF10A	CCG032238.1	2169	4	722	7.53	79193.4	Nuclear
	LcARF10B	CCG040657.1	2169	4	722	7.2	79234.5	Nuclear
	LcARF16A	CCG049471.1	2067	3	688	6.61	76049.4	Nuclear
	LcARF16B	CCG046720.1	2064	3	687	6.87	75919.2	Nuclear
	LcARF16C	CCG017850.1	2046	3	681	5.28	144937	Nuclear
	LcARF16D	CCG028634.1	2058	3	685	6.58	75512.5	Nuclear
	LcARF17A	CCG060006.1	1728	2	575	5.59	63484.3	Nuclear
	LcARF17B	CCG010774.1	1716	2	571	5.71	62895.7	Nuclear
