# Supplementary material for: Genome-wide characterization of the auxin response factor (ARF) gene family of litchi (Litchi chinensis Sonn.): phylogenetic analysis, miRNA regulation and expression changes during fruit abscission
Source: PeerJ. 2019 Apr 4;7:e6677. doi: 10.7717/peerj.6677 (PMC6451834; doi:10.7717/peerj.6677)
Supplement: Supplemental Information 2 [file peerj-07-6677-s002.xlsx]

## Sheet: Table S2
Table S2 Specific primers of 39 LcARF genes used for quantitative qRT-PCR in this study
Genes		Primer Sequnce (5' to 3')
LcEF-1α	Forword	CGTGGATTCGTCGCATCTAAC
	Reverse	CCGCCTGTCAATCTTGGTCAT
LcGAPDH	Forword	GATACAGTTCCCGTGTTGTTGAC
	Reverse	CATAAAGACACATAACACCACACTC
LcARF1A	Forword	CATTGTGGGTGTTGAGGATA
	Reverse	AGTTTGGAGGAGGAGGAGTT
LcARF1B	Forword	GCGTGTTGGAGTTAGGAGAC
	Reverse	CTTGGCTTGTAGACGATAGAAA
LcARF1C	Forword	GGATTGTCTGTTCCCAAGAA
	Reverse	CTCGTAGAATGTGCCGAAA
LcARF1D	Forword	CTACAAGCCAAGAACCATCC
	Reverse	CCTCACCCTCAAATCTCATC
LcARF2E	Forword	CCGACCTTTACATTTACCCA
	Reverse	GAACAAGTTGGATTTGGTGAGC
LcARF2F	Forword	GAACTTCGCATAGGGATTCGTCGTC
	Reverse	CGAGACTCTTTCTGGACACCTTATTC
LcARF2A	Forword	GGCGAAATCTAAAGCAGTTG
	Reverse	AGTATGCCAGAAGCCAAATC
LcARF2B	Forword	TAAGATGGCAGAATCCAACA
	Reverse	ATGACAAAGGCGACAACC
LcARF2C	Forword	TTGGCAGGAGGAGGTCCAGAAGA
	Reverse	TCAATGCGGAAGGGAGTGGCAGATG
LcARF2D	Forword	GTTAGGTATGGTGGGTTTGG
	Reverse	TCCCTTGAATGAGTTGGATT
LcARF3A	Forword	GCAGCAGAACGAAGATACAC
	Reverse	CCCACCTCACCAATAGACAT
LcARF3B	Forword	TCTCTCTCCTTCCTCTTCCA
	Reverse	ACACGACCAGGCTACTTCTC
LcARF4A	Forword	GTTGAAGAGACAGCGGAAAT
	Reverse	GGTAGATGGCAGGACTTGTT
LcARF4B	Forword	GGTCAGGTGGGATGAAGATA
	Reverse	AGCGACAGGGTAATCAGGT
LcARF4C	Forword	ACGCTTACGGCTTCTGATAC
	Reverse	AAATCTCCACTCCACTCCAT
LcARF5A	Forword	TAGTGAACAGGTGGCAGTTT
	Reverse	TGAAGACTCATTTGGGCATA
LcARF5B	Forword	CAGAGTGCAGTGAGGAGA
	Reverse	GTTGATTCCAATGGTGAC
LcARF6A	Forword	TTTCCTGGTAGGGAGTGTTC
	Reverse	AGGGTATGGTTGTGGAGTCA
LcARF6B	Forword	TAGATACCACCAAACCTGCTC
	Reverse	CTGCTGAGGATGAGACTGC
LcARF6C	Forword	GGGAGAGACAGCCAAGAGT
	Reverse	CTTTCACAACAGGGAAGGAG
LcARF6D	Forword	GTTGCGACTTGCGAGGAA
	Reverse	GTTGGTTGGCTGTTTGTT
LcARF7A	Forword	TCCTTGTCTGGGTCTGTTCT
	Reverse	ACTTGTTGGGCTTGCTGT
LcARF7B	Forword	TTGTCTGGGTCTGTTCTGC
	Reverse	CTTGCTGTGGTAGCCTCTG
LcARF8A	Forword	CGGTATTTCACACCCGTATT
	Reverse	GACTCATCCCAACCAACCT
LcARF8B	Forword	TGGTGTCCCTACCTACTGTG
	Reverse	GGAATCTGGCAATCAACTTC
LcARF9A	Forword	TCGCCTAAAGAGACACAGAG
	Reverse	ACCCTTCCAACATAGTCAGG
LcARF9B	Forword	GAGGTTTGAGGGAGAGGAAT
	Reverse	CCTTGGAATAGAGGCAGGT
LcARF10A	Forword	GAAGCAAAGTGAAGCCTGAT
	Reverse	CAGTCCAGAACACCAATGAA
LcARF10B	Forword	TGTTCCAGTGAGGCAGTCGT
	Reverse	CATTCCGCATCCCTGTGA
LcARF16A	Forword	ATCTTCTGACGGCTCTGGTT
	Reverse	CGACCTACATCTTCTGATTCC
LcARF16B	Forword	CAACAGAGAACTGCTTAGATGC
	Reverse	CAAGGGATGTGAAGATTTGA
LcARF16C	Forword	ATGGCAATGGATCGAGCTC
	Reverse	GTGGCAATCTTGTCTTCTTCCT
LcARF16D	Forword	TCAATCAGACGCCAACAAT
	Reverse	AGTCAACAAATGCCTCCTTG
LcARF17A	Forword	GTCAACCGCAAGAAACTGAT
	Reverse	CACTGCTCCCATACCTCTCT
LcARF17B	Forword	GATTCTGCGCCGATCAACC
	Reverse	CGAACCGTCTCCTCCACT
LcARF18A	Forword	GGCAGAAAGAAACTGATTGC
	Reverse	GGAACCGAAGAGGCATAAC
LcARF18B	Forword	GCCTTCTTCTCCTCATTTCA
	Reverse	CAAACAAACGGCAACTCCTA
LcARF19A	Forword	GCAGACTCCTCTAAGCCAAC
	Reverse	GCTGTCGTGATAATGGTGGT
LcARF19B	Forword	CAACTCAATCTTCCCTGCTT
	Reverse	GTCCTTGCTGGTTTCTGGT
